# Supplementary material for: Connexin43 mutations linked to skin disease have augmented hemichannel activity
Source: PubMed Central journal article supplement (PMC6328547; doi:10.1038/s41598-018-37221-2), 2019-01-10

## Supplementary Data

### Connexin43 mutations linked to skin disease have augmented hemichannel activity

Miduturu Srinivas, Thomas F. Jannace, Anthony G. Cocozzelli, Leping Li<sup>2</sup>, Nefeli Slavi, Caterina Sellitto, Thomas W. White\*

Full image blots from Figure 1 to comply with the digital image and integrity policies

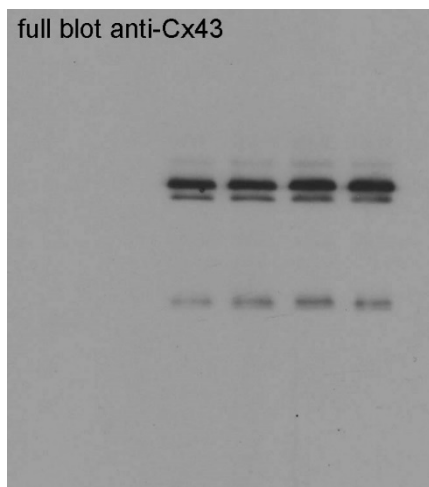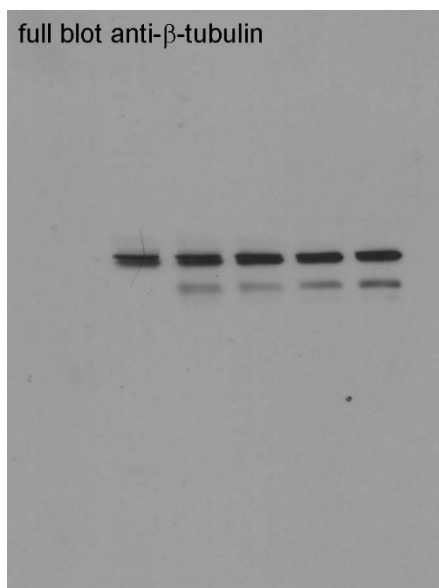

Supplement: 41598_2018_37221_MOESM1_ESM.pdf [file 41598_2018_37221_MOESM1_ESM.pdf]
